# Supplementary material
Source: PubMed Central journal article supplement (PMC7534385)
Supplement: NIHMS1633387-supplement-SI.pdf [file NIHMS1633387-supplement-SI.pdf]

## Supporting Information

The effect of macromolecular crowding on the FMN – heme intraprotein electron transfer in inducible NO synthase

Jinghui Li <sup>1</sup>, Huayu Zheng <sup>1,2</sup>, Changjian Feng <sup>1,2</sup> \*

<sup>1</sup> College of Pharmacy, University of New Mexico, Albuquerque, NM 87131, USA

<sup>2</sup> Department of Chemistry and Chemical Biology, University of New Mexico, Albuquerque, NM 87131, USA

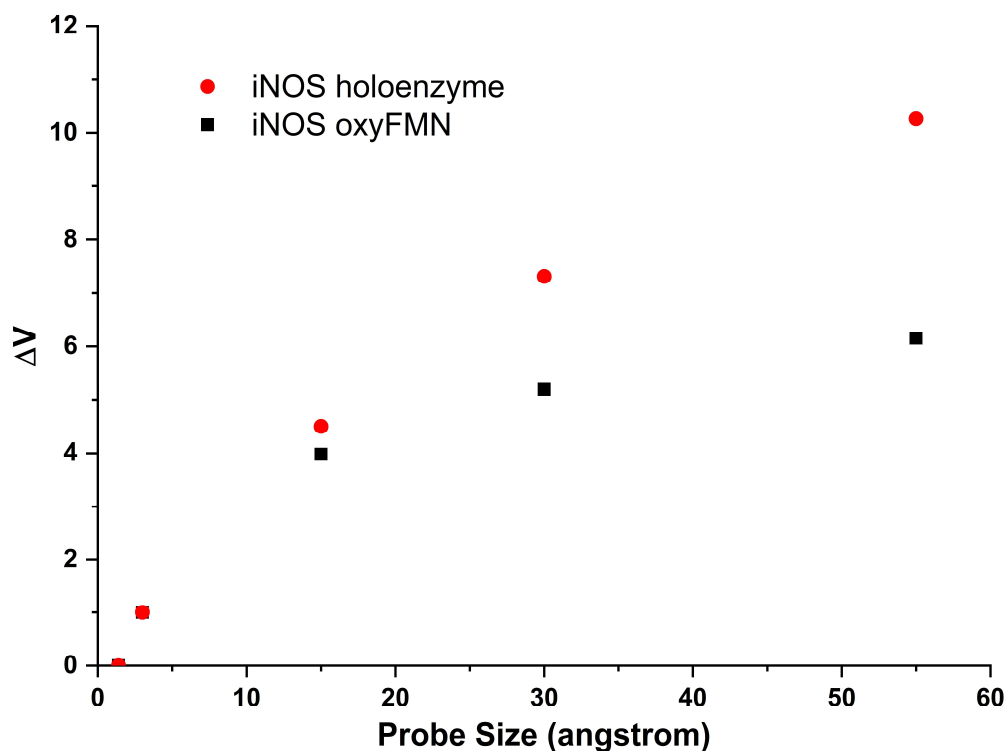

**Figure S1.** Plot of normalized excluded volumes for iNOS oxyFMN and holoenzyme with different probe sizes ( $\text{\AA}$ ). The normalized volume excluded from the probe is larger in the holoenzyme (red circles) than the oxyFMN construct (black squares).

**Table S1.** NO synthesis rates of human iNOS holoenzyme in the presence of Ficoll 70. <sup>a</sup>

| Ficoll 70% (w/v) | NO synthesis (min <sup>-1</sup> ) |
|------------------|-----------------------------------|
| 0                | 92.5 ± 2.1                        |
| 1                | 96.0 ± 3.7                        |
| 3                | 100.9 ± 4.1                       |
| 5                | 105.3 ± 3.0                       |
| 7                | 111.2 ± 3.9                       |
| 9                | 118.7 ± 3.7                       |
| 11               | 126.6 ± 3.2                       |
| 13               | 135.3 ± 6.0                       |
| 14               | 142.1 ± 1.9                       |

<sup>a</sup> Rates are the average of at least three assays. The final concentration of human iNOS holoenzyme is 20 nM.
